# Supplementary material
Source: publisher site journal article supplement (https://www.spandidos-publications.com/1996/downloadSupplementary)

Figure S1. mRNA expression levels of Txnip, Trx, and ITCH in HLECs. HLECs were treated with 5.5 mM glucose (LG, 5.5 mM) and 50 mM mannitol for 24 h. (A) Txnip. (B) Trx. (C) ITCH. Data are presented as the mean  $\pm$  standard deviation and analyzed by ANOVA followed by Tukey-Kramer multiple comparison post hoc tests. Txnip, thioredoxin interaction protein; Trx, thioredoxin; HLECs, human lens epithelial cells; LG, low glucose.

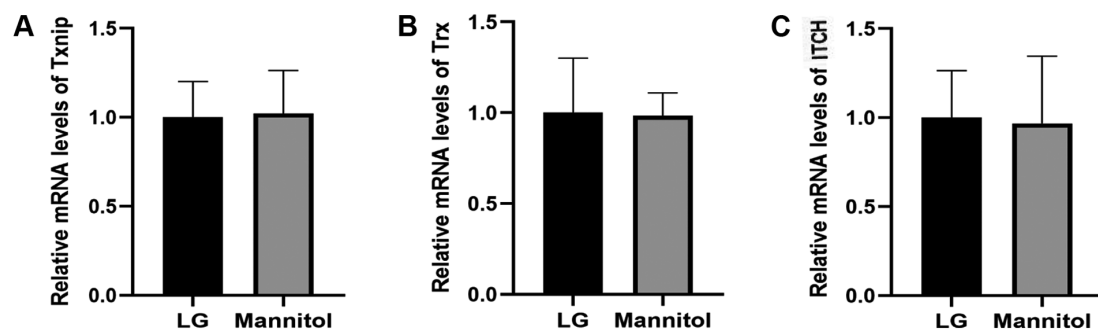

Supplement: Supplementary file 1 [file downloadSupplementary]
